# Supplementary material for: A Listeria monocytogenes Bacteriocin Can Target the Commensal Prevotella copri and Modulate Intestinal Infection
Source: PubMed Central journal article supplement — Cell Host Microbe. 2019 Nov 13;26(5):691–701.e5. doi: 10.1016/j.chom.2019.10.016 (PMC6854461; doi:10.1016/j.chom.2019.10.016), 2019-11-13
Supplement: mmc1.pdf [file mmc1.pdf]

**Supplemental Information**

***A *Listeria monocytogenes* Bacteriocin Can Target  
the Commensal *Prevotella copri*  
and Modulate Intestinal Infection***

**Nathalie Rolhion, Benoit Chassaing, Marie-Anne Nahori, Jana de Bodt, Alexandra Moura, Marc Lecuit, Olivier Dussurget, Marion Bérard, Massimo Marzorati, Hannah Fehlner-Peach, Dan R. Littman, Andrew T. Gewirtz, Tom Van de Wiele, and Pascale Cossart**

## Supplemental information

**Figure S1. Related to Figure 1.** (A) Schematic representation of the *lmo2776* genetic region. (B) Amino acid alignment of Lmo2776 with members of the Lnc972 family: L82330 from *Lactococcus lactis* subsp. *lactis* Il1403, SP\_0109 bacteriocin from *Streptococcus pneumoniae* TIGR4, SAP109 from *Staphylococcus aureus* subsp. *aureus* N315, lcn972 lactococcin 972 from *Lactococcus lactis* subsp. *lactis* and Sil from *Streptococcus iniae* SF. The conserved residues and consensus motif are indicated in color and on the bottom, respectively. (C) Cluster analysis based on core genome multilocus sequence typing (cgMLST) profiles of 1,696 genomes (obtained from Moura et al., 2016) and distribution of *lmo2774*-*lmo2775*-*lmo2776* genes (in blue) across *Lm* phylogenetic lineages. The ten most frequent sublineages (SL) are highlighted. The serogroup and sample source are shown in the first and last columns, respectively, using the color code indicated in the upper right key. (D) Relative expression of *lmo2774*, *lmo2775* and *lmo2776* in bacteria grown in stationary phase (white bars) compared to bacteria grown in exponential phase (black bars). The transcripts levels were normalised to the levels of *rpoB*, which were constant under all conditions, and then expressed relative to those of exponential phase. Results are expressed as mean  $\pm$  SEM of a least 3 independent experiments and P-values were obtained using two-tailed unpaired Student's t-test (\* $p < 0.05$ ). (E) Relative expression of *lmo2774*, *lmo2775* and *lmo2777* in  $\Delta$ *lmo2776* bacteria compared to WT bacteria, grown in exponential phase (black bars) or in stationary phase (grey bars). The transcripts levels were normalised to the levels of *rpoB*, which were constant under all conditions. Results are expressed as mean  $\pm$  SEM of a least 3 independent experiments. (F) Growth curves of WT and  $\Delta$ *lmo2776* bacteria at 37°C with shaking in BHI. (G) BALB/c mice were inoculated orally with *Lm* WT (EGDe) or  $\Delta$ *lmo2776* bacteria. CFUs in the intestinal luminal content were assessed at 24, 48 and 72h pi. (H) BALB/c mice were inoculated intravenously with WT or  $\Delta$ *lmo2776* bacteria. CFUs in the spleen and the liver were assessed at 72h pi. Each dot represents the value for one mouse. Statistically significant differences were evaluated by the Mann–Whitney test. (\* $p < 0.05$ ).

**Figure S2. Related to Figure 2.** (A) Principal coordinates analysis of the weighted Unifrac distance matrix of conventional mice at day 0 (red) and infected with WT strain at day 1 (blue). Permanova  $P = 0.002$ . (B) Relative abundance of classes in conventional mice at day 0 (left) and infected with WT strain at day 1 (right). LEfSE (C) and histogram of the LDA scores (D) computed for features differentially abundant between microbiota of mice at day 0 (red) and

infected with WT strain at day 1 (green). (E) Firmicutes/Bacteroides ratio in microbiota of mice at day 0 and infected with WT strain at day 1. Each dot represents the value for one mouse.

**Figure S3. Related to Figure 3.** Levels of butyrate (A), isobutyrate (B), acetate (C) and isovalerate (D) in SHIME® vessels infected with WT or  $\Delta lmo2776$  strains or non-infected overtime. Results are expressed as mean  $\pm$  SEM for 2 to 3 individual vessels. Numbers of *Bs* (E) and of different *Lm* strains (F) were quantified after 6h of co-culture. Numbers of *Bs* or *E. coli* (G) after incubation with supernatant of WT or  $\Delta lmo2776$  strains. Results are expressed as mean  $\pm$  SEM of a least 3 independent experiments and P-values were obtained using two-tailed unpaired Student's t-test (\*p<0.05, \*\*\*p<0.005).

**Figure S4. Related to Figure 4.** Assessment of listerial CFUs in the liver of germfree (GF) C57BL/6J mice colonized or not with *Pc*, *Ps* or *Bt* or stably colonized with 12 bacterial species (Oligo-MM<sup>12</sup>) for 2 weeks and then inoculated with *Lm* WT or  $\Delta lmo2776$  for 72h. Each dot represents one mouse.

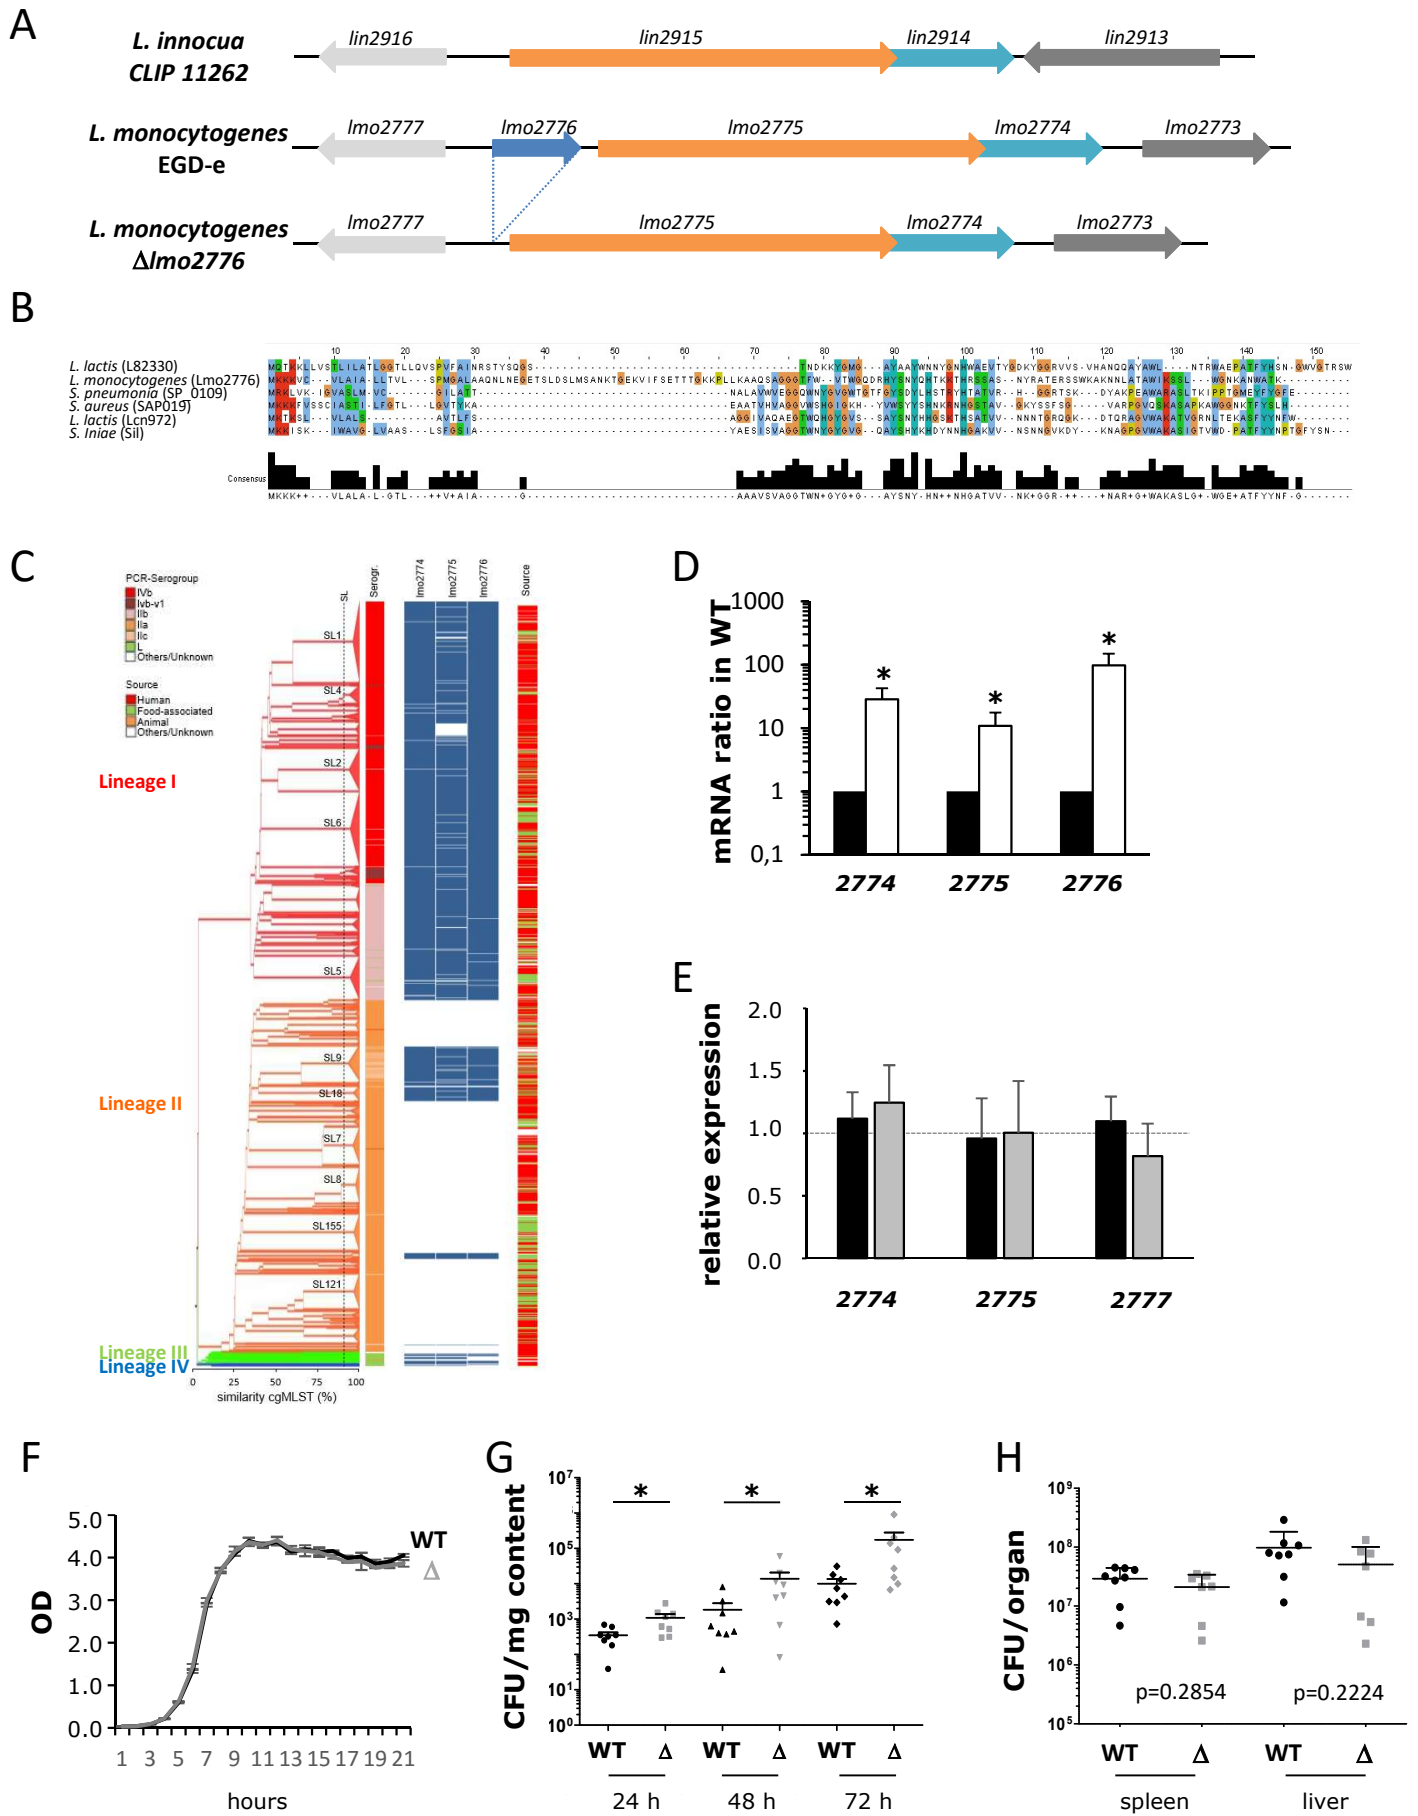

Figure S1

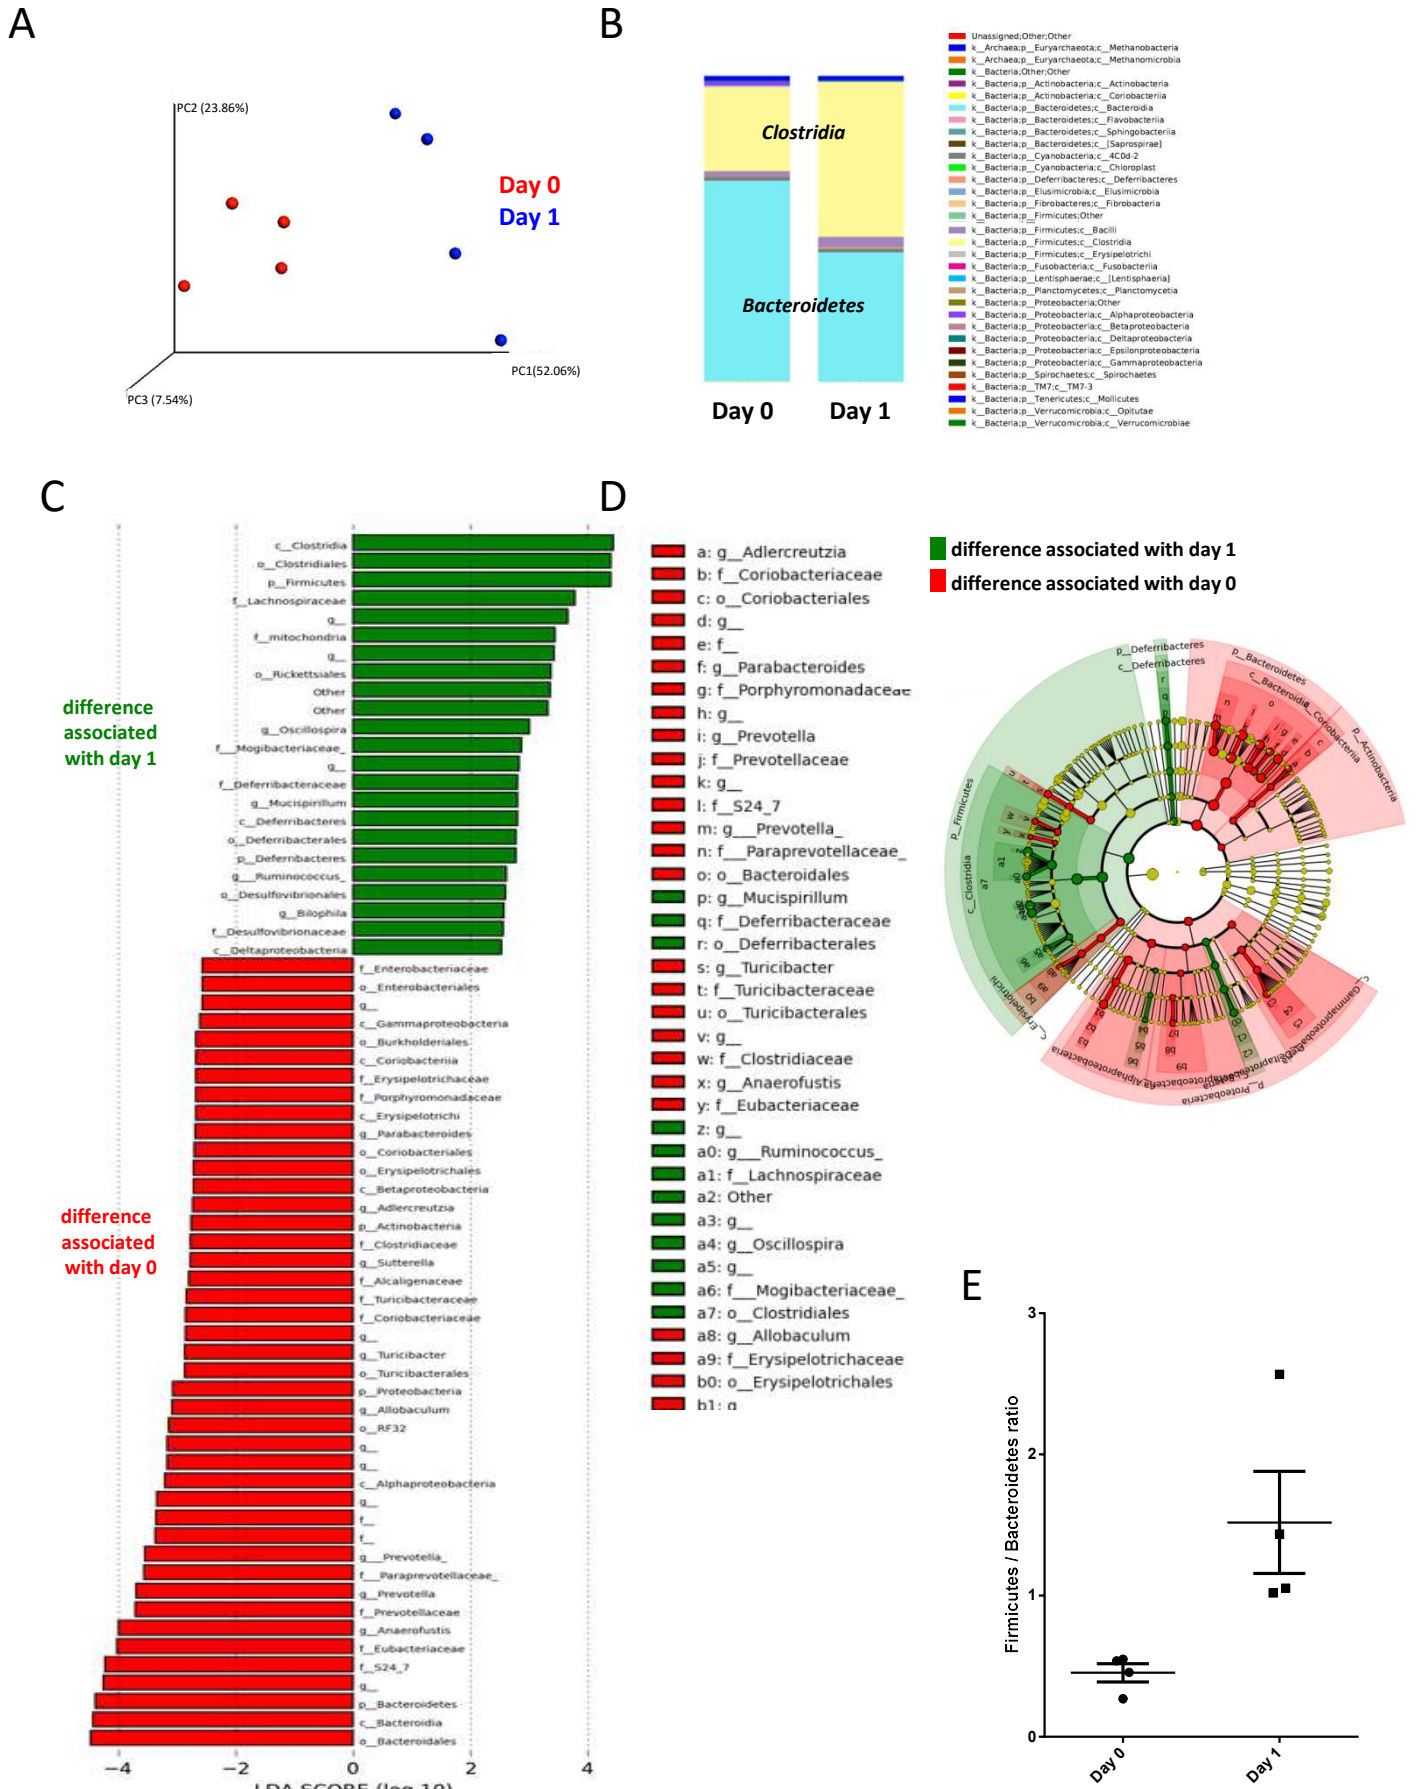

Figure S2

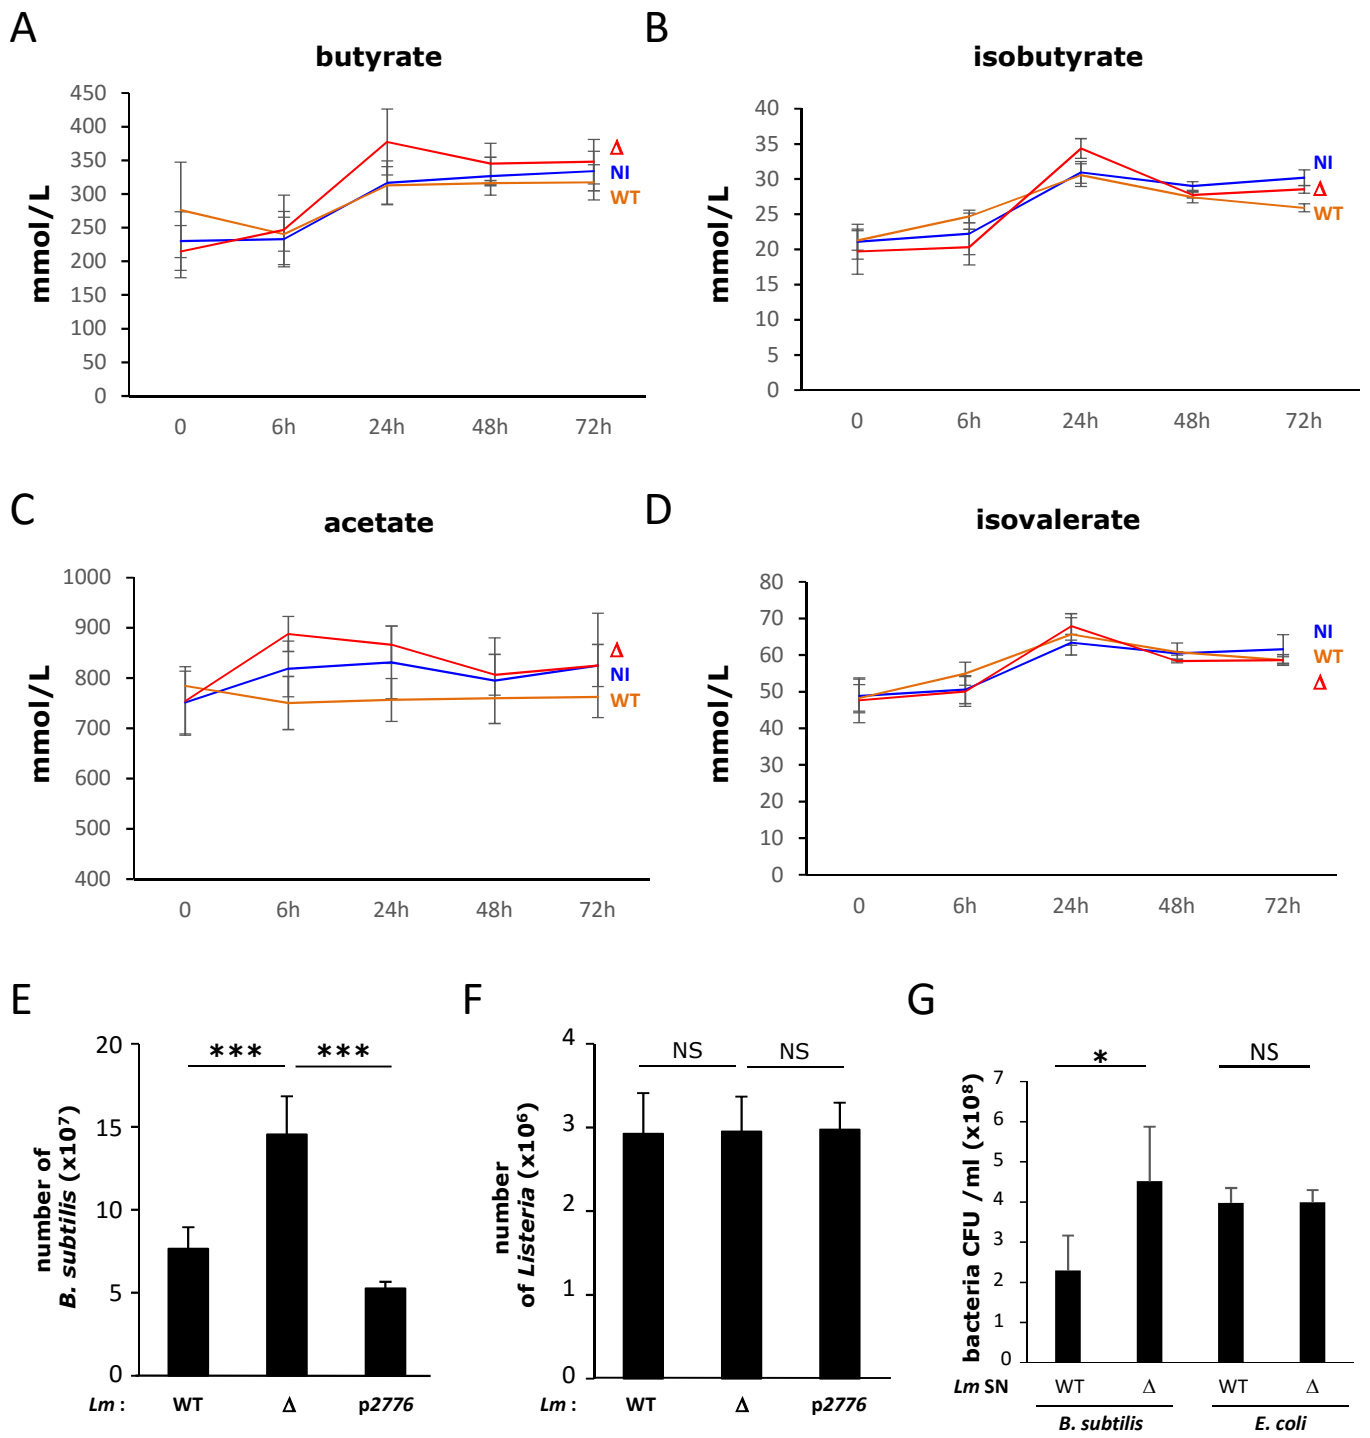

**Figure S3**

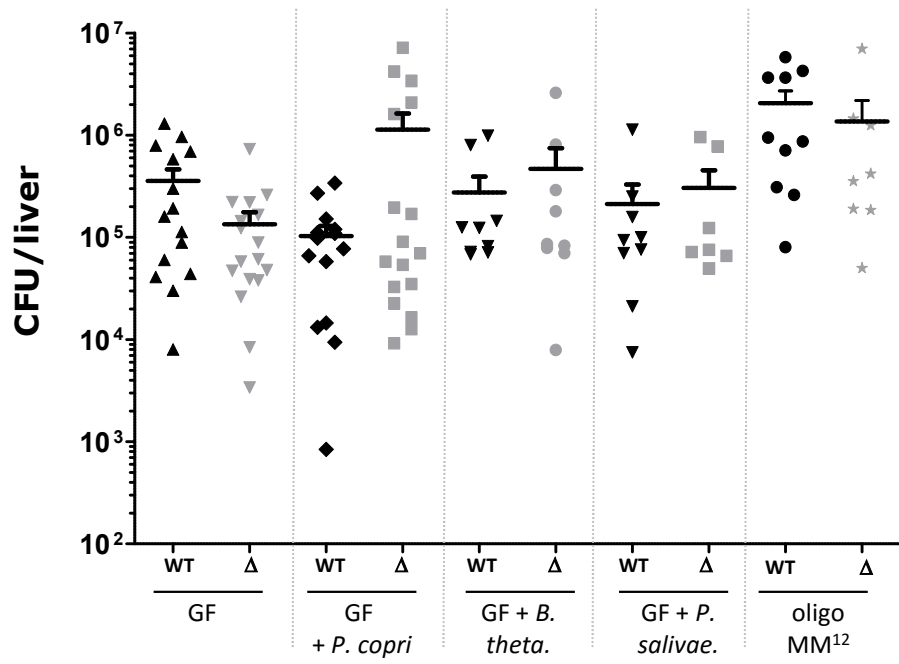

Figure S4

**Table S1 Oligonucleotides used in study, related to methods, Figure S1, Figure 2 and Figure 3**

| Experiment                                                                   | Primer ID        | Sequence                                           | Source                 |
|------------------------------------------------------------------------------|------------------|----------------------------------------------------|------------------------|
| Oligonucleotides used to create deletion mutant                              | Lmo2776-DelA     | GGAAGATCTACATCCTTCACAGGGAAATG                      | This study             |
|                                                                              | Lmo2776-DelB     | TGTATTCTCCTCTCTTTCAAATTAA                          |                        |
|                                                                              | Lmo2776-DelC     | TTAATTTGAAAGAGAGGAGAATACATTCTATAAAGCTAAGAAATATTTTC |                        |
|                                                                              | Lmo2776-DelD     | CGGCCATGGAGCAAAGTCATAAGTAACGGGATAT                 |                        |
| Sequencing insert in pAD-based plasmid                                       | pPL2-Fw          | TTCGACCCGGTCGTCGGTTC                               |                        |
|                                                                              | pPL2-Rv          | CTTAGACGTCATTAACCCCTCAC                            |                        |
| Verification of pAD integration in the <i>Lm</i> chromosome                  | NC16             | GTCAAAACATACGCTCTTATC                              | Balestrino et al, 2010 |
|                                                                              | PL95             | ACATAATCAGTCCAAAGTAGATGC                           |                        |
| qRT-PCR for gene expression level, related to Figure S1                      | lmo2774 1        | GTGTTAGAAAACCTTATCCATTACAGG                        | This study             |
|                                                                              | lmo2774 2        | ATCATCCAAGTTGCCTGTTGGTTCG                          |                        |
|                                                                              | lmo2775 1        | GGTCTTTAAAGGTTTATGACTTTGG                          |                        |
|                                                                              | lmo2775 2        | CCCATATACGATTAATAAACC                              |                        |
|                                                                              | lmo2776 RT1      | GTATGTGTTTTAGCGATAGCA                              |                        |
|                                                                              | lmo2776 RT2      | ATAATGTCTATCTTGTCCCC                               |                        |
|                                                                              | lmo2777 RT1      | CTACCACGGAAATGATCGCC                               |                        |
|                                                                              | lmo2777 RT2      | GCACACTAAAGGAGGTAGCG                               |                        |
|                                                                              | rpoB F           | GCGAACATGCAACGTCAAGCAGTA                           |                        |
|                                                                              | rpoB R           | ATGTTTGGCAGTTACAGCAGCACC                           |                        |
| q-PCR for 16S rRNA based bacterial quantification, related to Figure 2 and 3 | Prevotella 16S F | CACRGTAACGATGGATGCC                                | Scher et al, 2013      |
|                                                                              | Prevotella 16S R | GGTCGGGTTGCAGACC                                   |                        |
|                                                                              | Universal 16S F  | ACTCCTACGGGAGGCAGCAGT                              |                        |
|                                                                              | Universal 16S R  | ATTACCGCGGCTGCTGGC                                 |                        |
|                                                                              | Am_fwd           | CAGCACGTGAAGGTGGGGAC                               |                        |
|                                                                              | Am_rev           | CCTTGCGGTTGGCTTCAGAT                               |                        |
